1 **Virologic features of SARS-CoV-2 infection in children**

2

3 Lael M. Yonker<sup>1,2,3\*</sup>, Julie Boucau<sup>4\*</sup>, James Regan<sup>5</sup>, Manish C. Choudhary<sup>3,5</sup>, Madeleine D.

4 Burns<sup>1</sup>, Nicola Young<sup>1</sup>, Eva J. Farkas<sup>1</sup>, Jameson P. Davis<sup>1</sup>, Peter P. Moschovis<sup>2,3</sup>, T. Bernard

5 Kinane<sup>2,3</sup>, Alessio Fasano<sup>1,2,3</sup>, Anne M. Neilan<sup>2,3,6</sup>, Jonathan Z. Li<sup>3,5\*</sup>, Amy K. Barczak<sup>3,4,6\*</sup>

6

7 1. Massachusetts General Hospital, Mucosal Immunology and Biology Research Center,  
8 Boston, MA, USA

9 2. Massachusetts General Hospital, Department of Pediatrics, Boston, MA, USA

10 3. Harvard Medical School, Boston, MA, USA

11 4. Ragon Institute of MGH, MIT and Harvard, Cambridge, MA, USA

12 5. Brigham and Women's Hospital, Department of Medicine, Boston, MA, USA

13 6. Massachusetts General Hospital, Department of Medicine, Boston, MA, USA

14

15 \*Authors contributed equally

16

17 **Correspondence:**

18 Lael Yonker: Massachusetts General Hospital, 55 Fruit St, Jackson 14, Boston, MA 02114.

19 617-724-2890. [Lyonker@mgh.harvard.edu](mailto:Lyonker@mgh.harvard.edu)

20

21 **Word count abstract: 200**

22 **Word count main text: 2894**

23

24 **Abstract**

25 **Background:** Data on pediatric COVID-19 has lagged behind adults throughout the pandemic.

26 An understanding of SARS-CoV-2 viral dynamics in children would enable data-driven public  
27 health guidance.

28 **Methods:** Respiratory swabs were collected from children with COVID-19. Viral load was  
29 quantified by RT-PCR; viral culture was assessed by direct observation of cytopathic effects and  
30 semiquantitative viral titers. Correlations with age, symptom duration, and disease severity were  
31 analyzed. SARS-CoV-2 whole genome sequences were compared with contemporaneous  
32 sequences.

33 **Results:** 110 children with COVID-19 (median age 10 years, range 2 weeks-21 years) were  
34 included in this study. Age did not impact SARS-CoV-2 viral load. Children were most infectious  
35 within the first five days of illness, and severe disease did not correlate with increased viral  
36 loads. Pediatric SARS-CoV-2 sequences were representative of those in the community and  
37 novel variants were identified.

38 **Conclusions:** Symptomatic and asymptomatic children can carry high quantities of live,  
39 replicating SARS-CoV-2, creating a potential reservoir for transmission and evolution of genetic  
40 variants. As guidance around social distancing and masking evolves following vaccine uptake in  
41 older populations, a clear understanding of SARS-CoV-2 infection dynamics in children is critical  
42 for rational development of public health policies and vaccination strategies to mitigate the  
43 impact of COVID-19.

44

45

46 **Keywords:** SARS-CoV-2, Pediatric COVID-19, Viral dynamics

47

## 48 **Background**

49 Since the SARS-CoV-2 virus ignited the COVID-19 global pandemic, the impact of the virus on  
50 children and the role that children play in this pandemic has been understudied. Initially,  
51 epidemiology reports suggested that children may have been relatively spared from infection,  
52 however, as COVID-19 testing became more available, it has been increasingly recognized that  
53 children can be infected with SARS-CoV-2 at rates comparable to adults [1, 2]. To date, over  
54 4.1 million children in the United States have been reported as testing positive for COVID-19 [3].  
55 Since the winter of 2020-2021, children under 19 years of age have represented one of the age  
56 groups with the highest rates of infection [4], which likely reflects a combination of increased  
57 number of infections among children plus increased vaccination rates amongst adults. Most  
58 children generally have milder symptoms when infected with SARS-CoV-2 [5], although a small  
59 subset of individuals develop severe disease. In the US, over 16,000 children have been  
60 hospitalized for acute COVID-19 with over 300 deaths reported[3]. A baseline understanding of  
61 the viral characteristics of SARS-CoV-2 infection in children is a necessary prerequisite to  
62 understanding the pathogenesis of severe presentations of COVID-19 [6].

63 At a population perspective, the role that children play in viral transmission remains poorly  
64 understood. Epidemiologic studies suggest that children exhibit lower transmission rates than  
65 adults [7], however, these findings are potentially confounded by higher rates of asymptomatic  
66 or pauci-symptomatic infection in children, increased social isolation by children early in the  
67 pandemic, and reduced COVID-19 testing in children. To date, one small study demonstrated  
68 that live virus can be cultured from children [8]. However, the types of systematic studies that  
69 have informed our understanding of the viral dynamics of SARS-CoV-2 in adult populations [9-  
70 11] have not similarly been carried out in children. As vaccination has become available for  
71 adults and adolescents in many places in the world and our understanding of transmission  
72 dynamics have evolved, masking and distancing policies are being relaxed[12]. Policy changes

73 have necessarily been made despite the paucity of data providing insight into the role that  
74 pediatric disease might play in ongoing transmission. As viral variants that enhance the potential  
75 for transmission and/or reduce vaccine efficacy emerge [13-15], the importance of identifying  
76 potential reservoirs of viral replication and transmission has been brought into the spotlight.  
77 Defining the virologic features of SARS-CoV-2 infection in children and the potential for children  
78 to transmit virus will facilitate rational public health decision-making for pediatric populations.

79 In this work, we sought to define fundamental virologic features of SARS-CoV-2 in a pediatric  
80 population across a range of disease severity. We analyzed respiratory swabs from children  
81 presenting to urgent care clinics or the hospital with symptomatic and asymptomatic COVID-19  
82 infection. Clinical factors, such as age, COVID-19 risk factors, and disease severity were  
83 compared with viral features including SARS-CoV-2 viral load, isolation of replication-competent  
84 virus, and whole viral sequencing. Our data indicate that age, from infancy through adulthood, is  
85 not a predictor of viral infection dynamics, and that children of all ages can have high SARS-  
86 CoV-2 viral loads of replication-competent virus, including variants, displaying comparable  
87 dynamics to those seen in adults.

88

## 89 **Methods**

### 90 **Sample collection**

91 Infants, children and adolescents  $\leq 21$  years of age presenting to Massachusetts General  
92 Hospital urgent care clinics or the hospital with either symptoms concerning for or known  
93 exposure to COVID-19 (4/2020-4/2021) were prospectively offered enrollment in the Institutional  
94 Review Board-approved MGH Pediatric COVID-19 Biorepository (IRB # 2020P000955) [16].  
95 After informed consent, and assent when appropriate, was obtained verbally, a research-  
96 designated swab of the nasopharynx, oropharynx and/or anterior nares was obtained and  
97 placed in phosphate buffered saline. Samples were aliquoted and stored at  $-80^{\circ}\text{C}$ . Samples

98 from patients who tested positive for COVID-19 on clinical SARS-CoV-2 RT-PCR testing were  
99 analyzed. Nasal samples from adults hospitalized with acute COVID-19 [10] (4/2020-8/2020;  
100 enrolled in Institutional Review Board-approved MGH COVID-19 Biorepository, IRB #  
101 2020P000804) with duration of symptoms equal to the hospitalized pediatric cohort were  
102 selected for comparative studies.

103

#### 104 **Clinical data collection**

105 Demographic and clinical factors were recorded through a combination of manual chart reviews  
106 and data extraction from electronic health records (EHR), then collected in a REDCap database  
107 [17] through the Partners Electronic Health Record Registry of Pediatric COVID-19 Disease  
108 (IRB # 2020P003588). Trained reviewers collected demographics, SARS-CoV-2 risk factors,  
109 comorbid conditions, medications, COVID-19 related symptoms, and laboratory tests. Outcome  
110 of initial presentation to care, admission status, and complications of COVID-19 disease were  
111 also extracted by manual review.

112

#### 113 **SARS-CoV-2 viral load quantification**

114 Virions were pelleted from anterior nasal, oropharyngeal, and nasopharyngeal swab fluids by  
115 centrifugation at approximately 21,000 x g for 2 hours at 4°C. RNA was extracted using Trizol-  
116 LS (ThermoFisher) according to the manufacturer's instructions. RNA was then concentrated by  
117 isopropanol precipitation, and SARS-CoV-2 RNA was quantified using the CDC N1 primers and  
118 probe [<https://www.cdc.gov/coronavirus/2019-ncov/lab/rt-pcr-panel-primer-probes.html>] as  
119 previously described [10]. As there was no significant difference in viral load from respiratory  
120 secretions obtained from the anterior nares, nasopharynx or oropharynx of participants  
121 (**Supplemental Figure 1**), samples were analyzed together, regardless of collection site.

122

#### 123 **Viral Culture**

124 Vero-E6 cells (ATCC) were maintained in D10+ media [Dulbecco's modified Eagle's media  
125 (DMEM) (Corning) supplemented with HEPES (Corning), 1X Penicillin/Streptomycin (Corning),  
126 1X Glutamine (Glutamax, ThermoFisher Scientific) and 10% Fetal Bovine serum (FBS) (Sigma)]  
127 in a humidified incubator at 37°C in 5% CO<sub>2</sub>. Vero-E6 cells were passaged every 3-4 days,  
128 detached using Trypsin-EDTA (Fisher Scientific) and seeded at 150,000 cells per wells in 24  
129 well plates for culture experiments and 20,000 cells per well in 96w plates the day before  
130 inoculation for median tissue culture infectious dose (TCID<sub>50</sub>) experiments.

131  
132 After thawing, each specimen was filtered through a Spin-X 0.45µm filter (Corning) at 10,000 x g  
133 for 5min. 50µL of the supernatant was then diluted in 450µL of D<sup>+</sup> media [DMEM supplemented  
134 with HEPES, 1X Penicillin/Streptomycin and 1X Glutamine]. The viral culture experiments were  
135 performed as previously reported [18] with the following modifications: 100µL of the solution was  
136 used to inoculate wells in a 24 well plate and 1mL of D<sub>2</sub><sup>+</sup> media [D<sup>+</sup> media with 2% FBS] was  
137 added to each well after 1 hour of incubation. The plates were then placed in a 5% CO<sub>2</sub>  
138 incubator at 37°C. For TCID<sub>50</sub> measurements conducted in parallel, 25µL of the Spin-X flow-  
139 through was used to inoculate Vero-E6 cells in a 96 well plate in the presence of 5µg/mL of  
140 polybrene (Santa Cruz Biotechnology) using 5-fold dilutions (5<sup>-1</sup> to 5<sup>-6</sup>) and 4 repeats for each  
141 sample. The plates were centrifuged for 1 hour at 2,000 x g at 37°C before being placed in a 5%  
142 CO<sub>2</sub> incubator at 37°C. The SARS-CoV-2 isolate USA-WA1/2020 strain (BEI Resources) was  
143 used as a positive control for CPE in both culture and TCID<sub>50</sub> experiments.

144  
145 Viral culture and TCID<sub>50</sub> plates were observed at 3- and 6-days post-infection with a light  
146 microscope and wells showing CPE were counted. The TCID<sub>50</sub> titers were calculated using the  
147 Spearman-Kärber method. For the culture plates, the supernatant of the wells displaying CPE  
148 was harvested 10-14 days post-infection and RNA was isolated using a QIAamp Viral RNA Mini  
149 kit (QIAGEN) for confirmation of the viral sequence.

150

## 151 **SARS-CoV-2 sequencing**

152 cDNA synthesis was performed using Superscript IV reverse transcriptase (Invitrogen). Whole  
153 viral amplification was performed with the ARTIC protocol using multiplexed primer pools designed  
154 with Primal Scheme generating 400-bp tiling amplicons [19, 20]. PCR products were pooled and  
155 Illumina library construction was performed using the Nextera XT Library Prep Kit (Illumina). The  
156 comparison dataset included 183 representative contemporaneous SARS-CoV-2 genomes from  
157 Massachusetts present in GISAID to assess for local clustering. Nucleotide sequence alignment  
158 was performed with MAFFT (multiple alignment using fast Fourier transform) [21]. Best-fit  
159 nucleotide substitution GTR+G+I was used for the datasets using model selection in IQ-Tree  
160 followed by maximum likelihood phylogenetic tree construction using IQ-Tree web server with  
161 1000-bootstrap replicates [22].

162

## 163 **Analysis**

164 All statistical analyses were performed using parametric comparisons in GraphPad Prism  
165 (Version 9.1.1), including Pearson correlation, ANOVA with multiple comparisons, and unpaired  
166 t test.

167

## 168 **Results**

### 169 **Clinical cohort**

170 One-hundred-ten children diagnosed with COVID-19 with a mean age of 10 years (range 0-21  
171 years) were included in the study (**Table 1**). There were slightly more boys (56%) than girls  
172 (44%) with SARS-CoV-2 infection included in our analyses. One third of the participants were  
173 White (33%), 10% African American/Black, and 4% were Asian; one third (38%) reported their  
174 ethnicity as Hispanic. Past medical history in children is reported in **Supplemental Table 1**.  
175 Thirty children were asymptomatic but were identified as having COVID-19: twenty-six children

176 (27%) presented to urgent care/COVID-19 testing sites because of a COVID-19 exposure, while  
177 four children (4%) were identified on routine screening during hospital admission. Eight (7%)  
178 presented with COVID-19 symptoms but had no known COVID-19 contact. The majority of  
179 participants with COVID-19 did not require hospitalization (72 children, 65%). Thirty-six children  
180 (33%) were hospitalized with COVID-19, although only 18 children (16%) required supplemental  
181 oxygen and/or invasive or non-invasive respiratory support (referred to as “moderate/severe  
182 COVID-19”).

183

#### 184 **Age did not impact SARS-CoV-2 viral load or recovery of replication competent virus**

185 Age is a well-established risk factor for developing severe COVID-19. Accordingly,  
186 asymptomatic patients were significantly younger than patients with mild disease, and pediatric  
187 patients who were hospitalized with hypoxemia were significantly older than asymptomatic  
188 children or children with mild disease (**Figure 1A**). However, viral load was not increased in  
189 more severe disease: asymptomatic children and children with mild disease displayed  
190 significantly higher viral loads than adults hospitalized with COVID-19 with comparable duration  
191 of symptoms (less than 10 days) (**Figure 1B**). However, there were no differences in viral load  
192 between pediatric patients hospitalized with moderate/severe disease and hospitalized adults of  
193 similar duration of illness (**Figure 1B**) (Adult demographics are detailed in **Supplemental Table**  
194 **2**).

195

196 The age of each infected child was analyzed to determine whether age impacted viral load.  
197 There was no significant correlation of age with viral load (**Figure 1C**), nor were there significant  
198 differences between ages when grouped by school levels: 0-4 years (infant through pre-school),  
199 5-10 years (elementary school), 11-16 years (middle school), 17 and older (high school and  
200 higher education) (ANOVA,  $P = 0.12$ ) (**Figure 1D**). Thus, a child’s age did not appear to impact



201 viral load: all children, from 2 weeks through 21 years of age, were equally capable of carrying a  
202 high viral load.

203  
204 As SARS-CoV-2 RNA detection by RT-PCR does not specify whether replication-competent  
205 virus is being shed, we next sought to ascertain risk factors for shedding live virus by performing  
206 viral culture assays for recoverable SARS-CoV-2 in parallel with viral load testing. From the 110  
207 participants, we collected 126 samples; live virus was cultured from 33 samples coming from 32  
208 participants. Of note, eight of these children with culturable SARS-CoV-2 were asymptomatic.  
209 Higher viral load was significantly predictive of shedding of live virus (t test,  $P < 0.0001$ ) (**Figure**  
210 **2A**). Consistent with the results for viral load, age was not correlated with viral culture results;  
211 virus was recovered from children ages 1 month through 21 years (**Figure 2B**). Semi-  
212 quantitative assessment of the amount of virus shed by an individual participant was assessed  
213 by median tissue culture infectious dose (TCID<sub>50</sub>). TCID<sub>50</sub> for culture-positive specimens  
214 correlated strongly with viral load (Pearson correlation  $r = 0.7$ ,  $P < 0.0001$ ) (**Figure 2C**) but did  
215 not correlate with age across all pediatric participants (**Figure 2D**).

216

### 217 **Children with COVID-19 were most infectious within first five days of illness**

218 To define the likely period of infectiousness in our pediatric population, we analyzed viral load,  
219 culturability, and TCID<sub>50</sub> in comparison with duration of symptoms. Of note, duration of  
220 symptoms does not necessarily indicate duration of infection, as time infection was acquired  
221 cannot be confirmed. Consistent with prior reports in adults [9], viral loads in children were the  
222 highest earliest in the course of illness and declined over time after symptom onset (Pearson,  $r$   
223  $= -0.4$ ,  $P < 0.001$ ) (**Figure 3A**). Viral load was highest in the first two days of symptoms, with  
224 significant decrease after 5 days of symptoms and further decline after 10 days of symptoms ( $P$   
225  $< 0.0001$ ) (**Figure 3B**). Analysis of pediatric viral culture results demonstrated that children  
226 tested early after symptom onset were more likely to shed replication competent virus ( $P =$

227 0.004) (**Figure 3C**). Correspondingly, semi-quantitative assessment of infectious viral shedding  
228 in children showed that the TCID50 was higher early after symptom onset and decreased over  
229 time. When grouped by days of symptoms, children in days 0-2 of their symptoms had the  
230 highest infectivity, while children with greater than six days of illness shed less virus ( $P = 0.004$ )  
231 (**Figure 3D**).

232  
233 We then sought to assess whether COVID-19 severity impacted the relationship between viral  
234 load and age in pediatric cohorts of varying severity: asymptomatic, mildly symptomatic, and  
235 moderate/severe pediatric COVID-19 patients. None of these COVID-19 severity groups  
236 revealed any correlation of age with viral load (**Figure 4A**). Further, there were no differences in  
237 viral clearance over the duration of illness, not only when comparing mild pediatric COVID-19  
238 with moderate/severe COVID-19, but also when comparing pediatric COVID-19 with adults  
239 hospitalized with COVID-19 (**Figure 4B**). Duration of symptoms did not affect the finding that  
240 viral load does not correlate with age of the infected child (**Supplemental Figure 2**).

241  
242 **Pediatric SARS-CoV-2 sequences were representative of those found in the community**

243 We successfully performed whole-viral sequencing of 57 respiratory samples from 54 children.  
244 Phylogenetic analysis of these pediatric sequences with contemporaneous Massachusetts  
245 sequences from GISAID showed that they were representative of the spectrum of sequences  
246 found in the community (**Figure 5**). Notable variants identified in the pediatric samples included  
247 four Alpha (B.1.1.7) and three Iota (B.1.526.2) variants. To validate our culture results on a  
248 subset of culture-positive samples, we sequenced virus isolated from the supernatant from 8  
249 positive samples. Sequences from the supernatant and respiratory specimens were identical in  
250 7 cases and demonstrated only 1 nucleotide change in the last case.

251  
252 **Discussion**

253 As the global COVID-19 pandemic took hold, infected older adults suffered high rates of  
254 hospitalization and death while infected children typically experienced paucisymptomatic or  
255 asymptomatic infection. While it is now clear that children can become infected with and  
256 transmit SARS-CoV-2, viral dynamics in children have been understudied, and a full  
257 understanding of the dynamics of infection in children is needed to inform public health policies  
258 specific to the pediatric population. Here, we show that pediatric patients of all ages, from  
259 infancy to young adulthood, can carry a high SARS-CoV-2 viral load in their upper airways,  
260 particularly early in the course of infection, and an elevated viral load corresponds with high  
261 levels of viable, replicating virus. Pediatric sequences were largely reflective of those found in  
262 the general community and the presence of novel variants was identified.

263  
264 Our findings have significant implications for both public health policy and the potential role of  
265 universal vaccination of pediatric populations in fully curbing the COVID-19 pandemic. As  
266 vaccination has rolled out in adult populations, public health policies are being adjusted to  
267 account for changes in risk that result from vaccination. Our results emphasize the importance  
268 of considering and clarifying how these policy changes relate to children. As adult populations  
269 have been vaccinated, pediatric cases have represented a growing proportion of infections,  
270 currently accounting for up to 25% of all COVID-19 cases across different regions of the United  
271 States[3]. Our results suggest that the low rates of transmission in settings such as schools and  
272 daycares cannot be attributed to low viral loads, low rates of viral shedding, or rapid clearance  
273 of virus in younger patient populations. As changes in masking and distancing policies are  
274 implemented for vaccinated adults, consideration of how and whether policies changes will be  
275 applied for children will be critical for ongoing reduction of new COVID-19 cases.

276  
277 Our results additionally suggest that pediatric populations have the potential to serve as a  
278 community reservoir of actively replicating virus, with implications for both new waves of

279 infection and the evolution of viral variants. The duration of natural and vaccine-induced  
280 immunity for each vaccine in clinical use are not yet known. If a community reservoir of actively  
281 replicating virus is maintained and transmitted within unvaccinated pediatric populations, that  
282 population could then serve as a source of new infections as vaccine-induced immunity wanes  
283 in vaccinated adult populations. In addition, viral genomic variants were readily identified in the  
284 pediatric samples and these variants have the potential to impact viral transmission [23-25],  
285 disease severity [26, 27], and vaccine efficacy [28]. Ongoing viral replication within pediatric  
286 populations has the potential to serve as a source of existing and new viral variants that  
287 interfere with eradication efforts.

288

289 Our study has several limitations. First, the data collected here represent a single medical  
290 center and affiliated pediatric urgent care/COVID-19 screening clinics. However, these were  
291 amongst the few pediatric testing centers encompassing a large catchment area during the  
292 duration of this study, and patients enrolled spanned a wide range of symptoms. Additionally,  
293 many of these samples were collected early in the pandemic and SARS-CoV-2 variants of  
294 interest have shifted over time. Ongoing studies analyzing shifts in virologic features of SARS-  
295 CoV-2 infection in children alongside studies of infection in adults are needed to better  
296 understand the full reach of the COVID-19 pandemic.

297

298 Ultimately, our data suggest that although age is generally protective against severe disease,  
299 children, especially early in the infection course, carry high viral loads of SARS-CoV-2, which  
300 can include viral variants. Our results underline the importance of defining public health policy  
301 with viral dynamics in children in mind and of including pediatric populations in vaccine efforts  
302 aimed at eradication.

303

304

305 **Acknowledgements:**

306 The viral culture work was performed in the Ragon Institute BSL3 core, which is supported in  
307 part by the NIH-funded Harvard University Center for AIDS Research (P30 AI060354). This  
308 research was supported by the National Heart, Lung, and Blood Institute (5K08HL143183 to  
309 LMY), the Department of Pediatrics at Massachusetts General Hospital *for* Children (to LMY),  
310 the Massachusetts Consortium for Pathogen Readiness and a gift from Mark and Lisa Schwartz  
311 (to JZL).

312

313 **Conflicts of Interest**

314 The authors do not report any conflicts of interest.

315

316

- 317 1. Mehta NS, Mytton OT, Mullins EWS, et al. SARS-CoV-2 (COVID-19): What Do We Know About  
318 Children? A Systematic Review. *Clin Infect Dis* **2020**; 71:2469-79.
- 319 2. Heald-Sargent T, Muller WJ, Zheng X, Rippe J, Patel AB, Kociolek LK. Age-Related Differences  
320 in Nasopharyngeal Severe Acute Respiratory Syndrome Coronavirus 2 (SARS-CoV-2) Levels in  
321 Patients With Mild to Moderate Coronavirus Disease 2019 (COVID-19). *JAMA Pediatr* **2020**;  
322 174:902-3.
- 323 3. [https://services.aap.org/en/pages/2019-novel-coronavirus-covid-19-infections/children-and-](https://services.aap.org/en/pages/2019-novel-coronavirus-covid-19-infections/children-and-covid-19-state-level-data-report/)  
324 [covid-19-state-level-data-report/](https://services.aap.org/en/pages/2019-novel-coronavirus-covid-19-infections/children-and-covid-19-state-level-data-report/).
- 325 4. <https://www.mass.gov/info-details/covid-19-response-reporting>.
- 326 5. Yonker LM, Neilan AM, Bartsch Y, et al. Pediatric Severe Acute Respiratory Syndrome  
327 Coronavirus 2 (SARS-CoV-2): Clinical Presentation, Infectivity, and Immune Responses. *J Pediatr*  
328 **2020**; 227:45-52 e5.
- 329 6. Fialkowski A, Gernez Y, Arya P, Weinacht KG, Kinane TB, Yonker LM. Insight into the pediatric  
330 and adult dichotomy of COVID-19: Age-related differences in the immune response to SARS-  
331 CoV-2 infection. *Pediatr Pulmonol* **2020**.
- 332 7. Soriano-Arandes A, Gatell A, Serrano P, et al. Household SARS-CoV-2 transmission and  
333 children: a network prospective study. *Clin Infect Dis* **2021**.
- 334 8. L'Huillier AG, Torriani G, Pigny F, Kaiser L, Eckerle I. Culture-Competent SARS-CoV-2 in  
335 Nasopharynx of Symptomatic Neonates, Children, and Adolescents. *Emerg Infect Dis* **2020**;  
336 26:2494-7.
- 337 9. Weiss A, Jellingso M, Sommer MOA. Spatial and temporal dynamics of SARS-CoV-2 in COVID-  
338 19 patients: A systematic review and meta-analysis. *EBioMedicine* **2020**; 58:102916.
- 339 10. Fajnzylber J, Regan J, Coxen K, et al. SARS-CoV-2 viral load is associated with increased  
340 disease severity and mortality. *Nat Commun* **2020**; 11:5493.
- 341 11. Wolfel R, Corman VM, Guggemos W, et al. Virological assessment of hospitalized patients  
342 with COVID-2019. *Nature* **2020**; 581:465-9.
- 343 12. <https://www.cdc.gov/coronavirus/2019-ncov/index.html>.
- 344 13. Madhi SA, Baillie V, Cutland CL, et al. Efficacy of the ChAdOx1 nCoV-19 Covid-19 Vaccine  
345 against the B.1.351 Variant. *N Engl J Med* **2021**.
- 346 14. Liu Y, Liu J, Xia H, et al. BNT162b2-Elicited Neutralization against New SARS-CoV-2 Spike  
347 Variants. *N Engl J Med* **2021**.
- 348 15. Shinde V, Bhikha S, Hoosain Z, et al. Efficacy of NVX-CoV2373 Covid-19 Vaccine against the  
349 B.1.351 Variant. *N Engl J Med* **2021**.
- 350 16. Lima R, Gootkind EF, De la Flor D, et al. Establishment of a pediatric COVID-19 biorepository:  
351 unique considerations and opportunities for studying the impact of the COVID-19 pandemic on  
352 children. *BMC Med Res Methodol* **2020**; 20:228.
- 353 17. Harris PA, Taylor R, Thielke R, Payne J, Gonzalez N, Conde JG. Research electronic data  
354 capture (REDCap)--a metadata-driven methodology and workflow process for providing  
355 translational research informatics support. *J Biomed Inform* **2009**; 42:377-81.
- 356 18. Choi B, Choudhary MC, Regan J, et al. Persistence and Evolution of SARS-CoV-2 in an  
357 Immunocompromised Host. *N Engl J Med* **2020**; 383:2291-3.

- 358 19. Gonzalez-Reiche AS, Hernandez MM, Sullivan MJ, et al. Introductions and early spread of  
359 SARS-CoV-2 in the New York City area. *Science* **2020**; 369:297-301.
- 360 20. Quick J. nCoV-2019 sequencing protocol v1. Available at:  
361 <https://www.protocols.io/view/ncov-2019-sequencing-protocol-bbmuik6w>.
- 362 21. Katoh K, Rozewicki J, Yamada KD. MAFFT online service: multiple sequence alignment,  
363 interactive sequence choice and visualization. *Brief Bioinform* **2019**; 20:1160-6.
- 364 22. Trifinopoulos J, Nguyen LT, von Haeseler A, Minh BQ. W-IQ-TREE: a fast online phylogenetic  
365 tool for maximum likelihood analysis. *Nucleic Acids Res* **2016**; 44:W232-5.
- 366 23. Zhou B, Thao TTN, Hoffmann D, et al. SARS-CoV-2 spike D614G change enhances replication  
367 and transmission. *Nature* **2021**; 592:122-7.
- 368 24. Deng X, Garcia-Knight MA, Khalid MM, et al. Transmission, infectivity, and neutralization of  
369 a spike L452R SARS-CoV-2 variant. *Cell* **2021**.
- 370 25. Davies NG, Abbott S, Barnard RC, et al. Estimated transmissibility and impact of SARS-CoV-2  
371 lineage B.1.1.7 in England. *Science* **2021**; 372.
- 372 26. Davies NG, Jarvis CI, Group CC-W, et al. Increased mortality in community-tested cases of  
373 SARS-CoV-2 lineage B.1.1.7. *Nature* **2021**; 593:270-4.
- 374 27. Funk T, Pharris A, Spiteri G, et al. Characteristics of SARS-CoV-2 variants of concern B.1.1.7,  
375 B.1.351 or P.1: data from seven EU/EEA countries, weeks 38/2020 to 10/2021. *Euro Surveill*  
376 **2021**; 26.
- 377 28. Garcia-Beltran WF, Lam EC, St Denis K, et al. Multiple SARS-CoV-2 variants escape  
378 neutralization by vaccine-induced humoral immunity. *Cell* **2021**; 184:2372-83 e9.
- 379
- 380

381 **Table 1:** Participant Demographics, past medical history, reason for presenting for SARS-CoV-2  
382 RT-PCR testing, and disease severity of children with COVID-19 (n=110).

|                                                          | <b>COVID+ children (N=110)</b> |
|----------------------------------------------------------|--------------------------------|
| <i>Age, average (max, min)</i>                           | 10 (0,21)                      |
| <i>Sex, n (%)</i>                                        |                                |
| Male                                                     | 62 (56)                        |
| Female                                                   | 48 (44)                        |
| <i>Race, n (%)</i>                                       |                                |
| White                                                    | 36 (33)                        |
| Black                                                    | 11 (10)                        |
| Asian                                                    | 4 (4)                          |
| Other                                                    | 45 (41)                        |
| <i>Ethnicity, n (%)</i>                                  |                                |
| Hispanic                                                 | 42 (38)                        |
| <i>Past Medical History, n (%)</i>                       |                                |
| Obesity                                                  | 28 (25)                        |
| Asthma                                                   | 11 (10)                        |
| Other                                                    | 39 (35)                        |
| <i>Reason for presenting for COVID-19 testing, n (%)</i> |                                |
| Asymptomatic, exposure                                   | 30 (27)                        |
| Symptomatic, exposure                                    | 72 (65)                        |
| Symptomatic, no exposure                                 | 8 (7)                          |
| <i>COVID-19 Severity, n (%)</i>                          |                                |
| Hospitalized                                             | 36 (33)                        |
| Supplemental oxygen                                      | 18 (16)                        |
| Outpatient                                               | 75 (68)                        |

383

384

385



386 **Figure 1:** COVID-19 disease severity and SARS-CoV-2 viral load across age groups. **A.** Age of  
 387 pediatric patients with SARS-CoV-2 infection, stratified by disease severity: asymptomatic  
 388 (n=27), mild disease, outpatient (n=48), moderate/severe COVID-19, hospitalized (n=18).  
 389 Analyzed by ordinary one-way ANOVA. **B.** SARS-CoV-2 viral load was quantified across a  
 390 range of disease severities. Patients presenting with  $\leq 10$  days of symptoms were compared,  
 391 including asymptomatic pediatric outpatients (n=27), mildly symptomatic pediatric outpatients  
 392 (n=44), moderate/severe pediatric hospitalized patients with oxygen requirement (n=18), and  
 393 moderate/severe adult hospitalized patients (n=29). Analyzed by ordinary one-way ANOVA. **C.**  
 394 Viral load for each specimen (n=110) was determined by qPCR, plotted against participant age  
 395 and analyzed by Pearson correlation. **D.** Viral load levels reported by school age group: 0-4  
 396 years old (yo)– infant through pre-school (n=32), 5-10yo – elementary school (n=23), 11-16yo –  
 397 middle school (n=33), 17yo and over – high school and higher education (n=22). Analyzed by  
 398 ordinary one-way ANOVA. Dotted lines depict limit of detection. \*  $P < 0.05$ , \*\*\*  $P < 0.001$ , \*\*\*\*  $P <$   
 399  $0.0001$ , ns = not significant

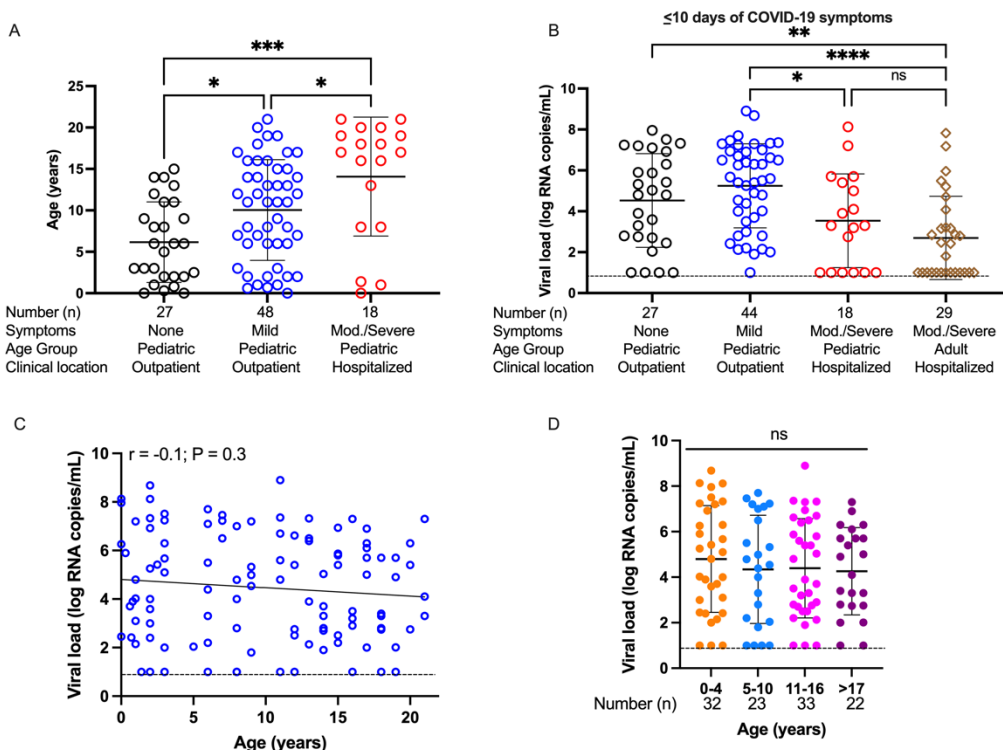

401 **Figure 2:** SARS-CoV-2 culture results across age groups and viral load. **A-B.** Samples with  
402 observable CPE (culture +) (n=31) or without observable CPE (culture -) (n=95) plotted against  
403 viral load (**A**) and participant age (**B**) and compared using t test. **C-D.** Semiquantitative viral titer  
404 expressed as TCID<sub>50</sub>/mL for culture positive samples plotted against corresponding viral load  
405 (**C**) or participant age (**D**), Analyzed using Pearson correlation. Dotted line depicts limit of  
406 detection. \*\*\*\* P < 0.0001  
407

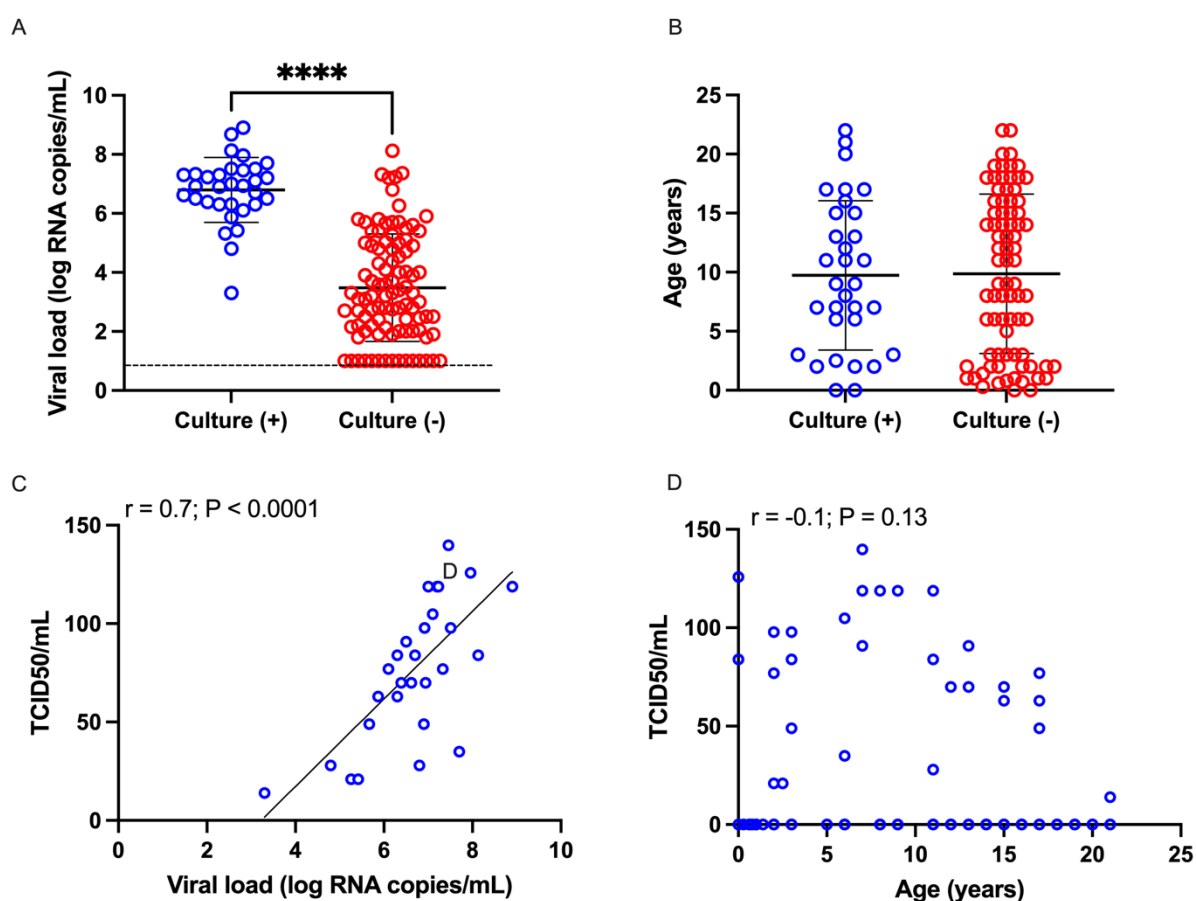

408

409

410 **Figure 3:** Culture positivity and duration of symptoms. **A.** Viral load for each specimen was  
411 determined by qPCR and plotted against the duration of symptoms (in days). Analysis by  
412 Pearson correlation. **B.** Viral load reported by binned duration of symptoms. Ordinary one-way  
413 ANOVA used for analysis. **C.** Duration of symptoms for samples with observable CPE (culture  
414 +, n=29) and without observable CPE (culture -, n=85). Analysis by t test. **D.** Semiquantitative  
415 viral titer reported by binned duration of symptoms, analyzed by ordinary one-way ANOVA.  
416 Dotted lines depict limit of detection. \*\* P < 0.01, \*\*\*\* P < 0.0001

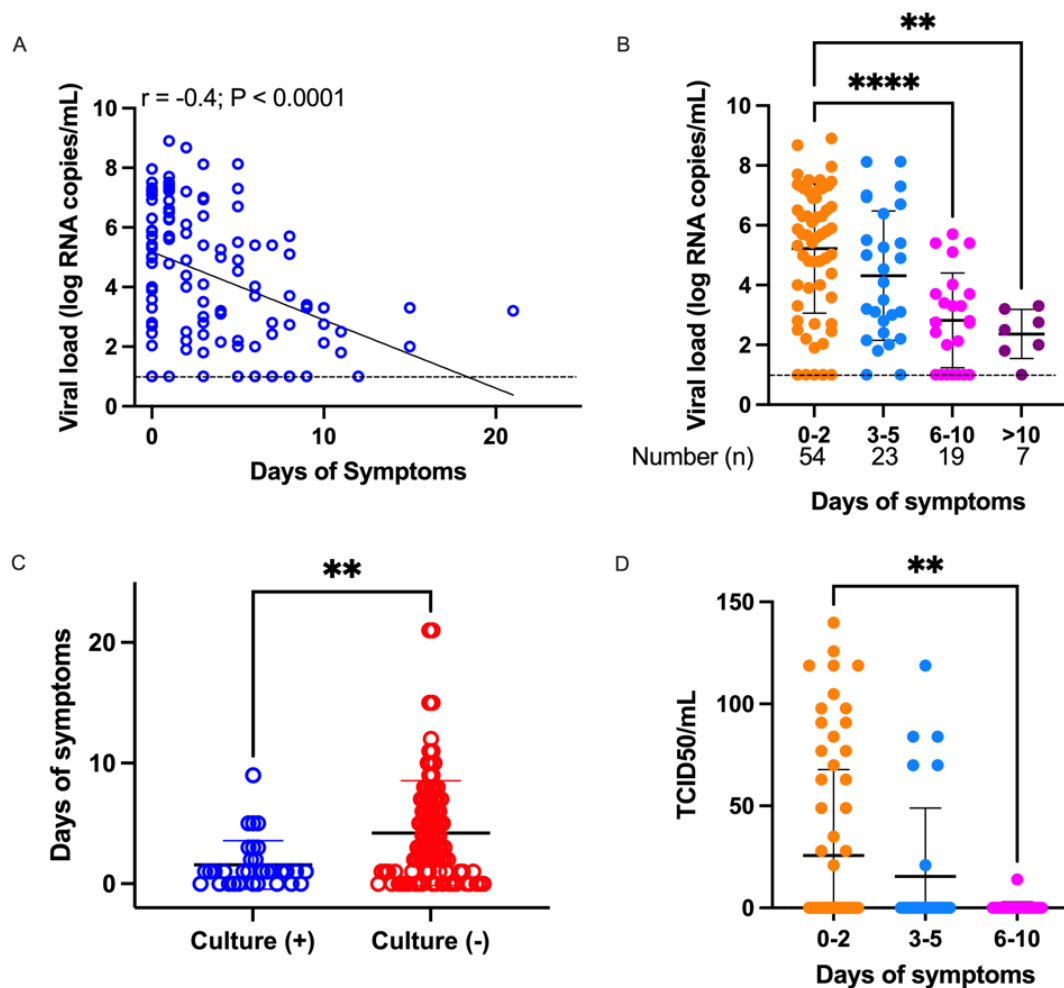

417

418

419 **Figure 4:** Correlation of viral load with age and duration of illness based on disease severity.

420 **A.** Correlation of viral load and age, stratified by asymptomatic (n=30), mild outpatient (n=48)

421 and moderate/severe hospitalized (n=18) cohorts. **B.** Viral load of hospitalized adult (n=29),

422 hospitalized pediatric participants requiring respiratory support (n=18) and pediatric outpatients

423 with mild disease (n=48), plotted against duration of symptoms. Dotted lines depict limit of

424 detection.

425

A

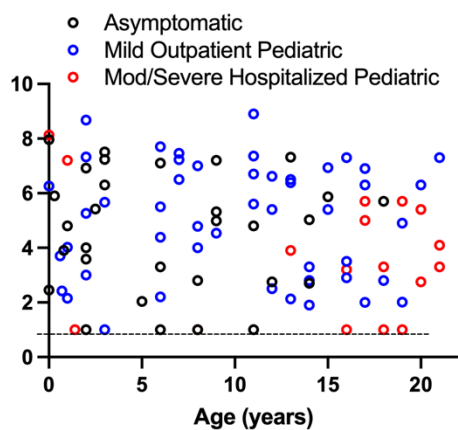

B

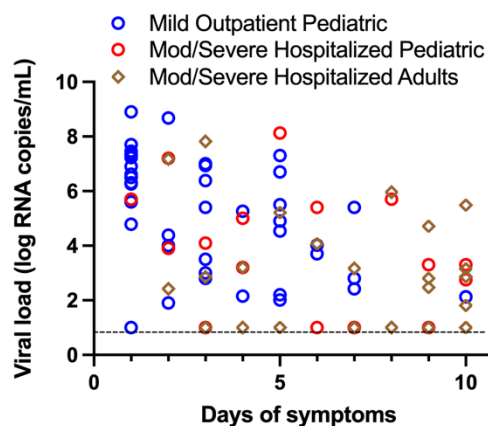

426

427 **Figure 5.** Phylogenetic analysis of pediatric and community SARS-CoV-2 sequences. Maximum  
428 likelihood tree generated from pediatric sequences (red) and 183 contemporaneous  
429 Massachusetts sequences from GISAID.

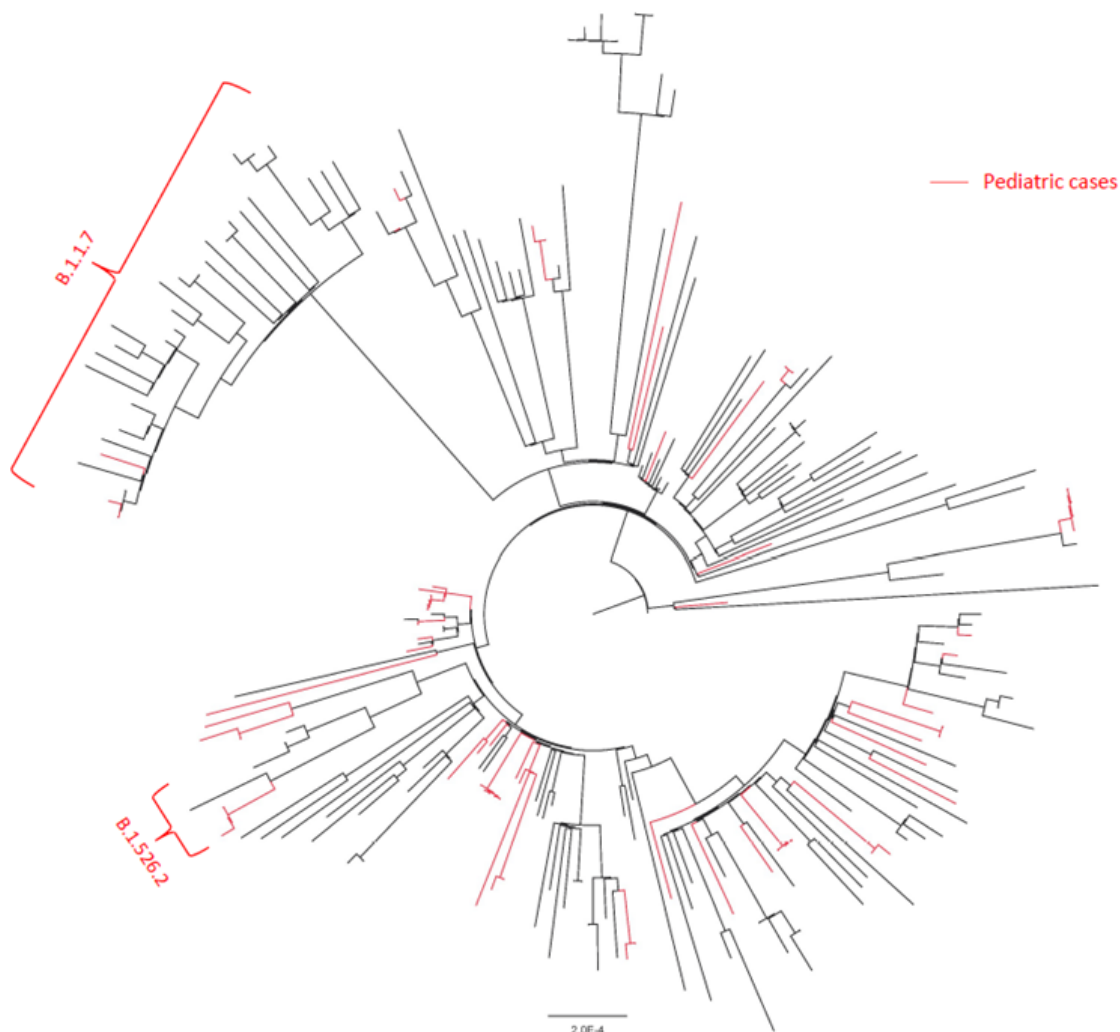

430

431

432 **Supplemental Table 1: Past medical history of children infected with SARS-CoV-2.**  
433

| <b>Past Medical History - Pediatric Patients</b> |
|--------------------------------------------------|
| Acute recurrent pancreatitis                     |
| ADHD                                             |
| Alopecia                                         |
| Asthma                                           |
| Autism                                           |
| Cardiac conduction disorder                      |
| Chronic kidney disease                           |
| Coats Plus Syndrome                              |
| Crohn's disease                                  |
| Cystic Fibrosis                                  |
| Eczema                                           |
| Epilepsy                                         |
| G6PD Deficiency                                  |
| Glutaric acidemia, type 1                        |
| Liver transplant                                 |
| Mitochondrial complex 1 deficiency               |
| Obesity                                          |
| Obstructive sleep apnea                          |
| Prematurity                                      |
| Sickle cell trait                                |
| Speech delay                                     |
| Subglottic stenosis                              |
| Tracheobronchomalacia                            |

434

435

436 **Supplemental Table 2:** Demographics, past medical history and disease severity of adults with  
437 COVID-19 (n=29) included in analysis of SARS-CoV-2 viral load.

|                          | <b>COVID+ adults<br/>(n=29)</b> |
|--------------------------|---------------------------------|
| Age, average (max, min)  | 62 (26,93)                      |
| Sex, number (%)          |                                 |
| Male                     | 13 (45)                         |
| Female                   | 16 (55)                         |
| Race, number (%)         |                                 |
| White                    | 20 (69)                         |
| Black                    | 5 (17)                          |
| Asian                    | 0 (0)                           |
| Other                    | 4 (14)                          |
| Ethnicity, number (%)    |                                 |
| Hispanic                 | 4 (14)                          |
| COVID-19 Severity        |                                 |
| Hospitalized, number (%) | 21 (100)                        |
| Respiratory support      | 22 (78)                         |
| Outpatient, number (%)   | 0 (0)                           |

438

439

440

441 **Supplemental Figure 1:** Viral load by sample collection location. Viral load of samples collected  
442 from nasopharynx (n=60), anterior nares (n=47), or oropharynx (n=19) were compared and  
443 analyzed by ordinary one-way ANOVA. ns = non-significant.

444

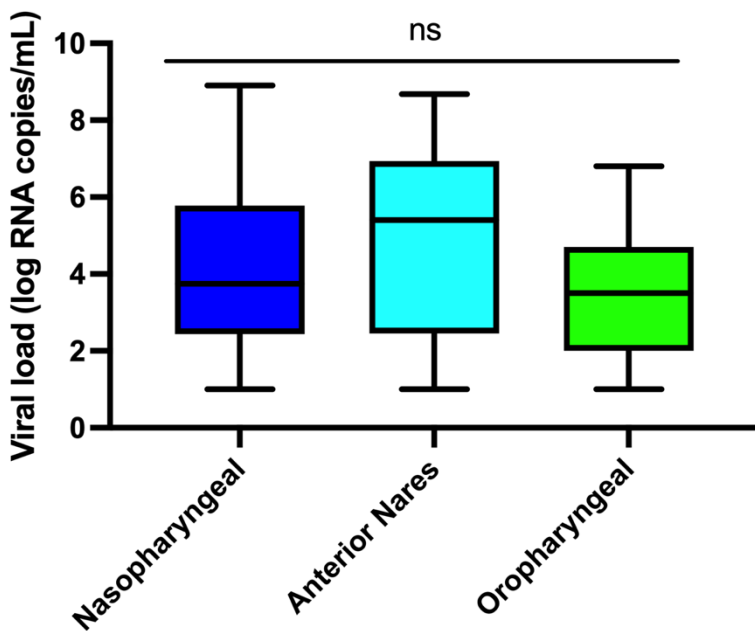

445

446



447 **Supplemental Figure 2:** Viral load plotted against pediatric patient age, for patients with 0-2  
448 days symptoms (n=67), 3-5 days symptoms (n=30), and  $\geq 6$  days of symptoms (n=29). No  
449 significant correlation in any grouping, when analyzed by Pearson correlation. Dotted lines  
450 depict limit of detection. ns = not significant.

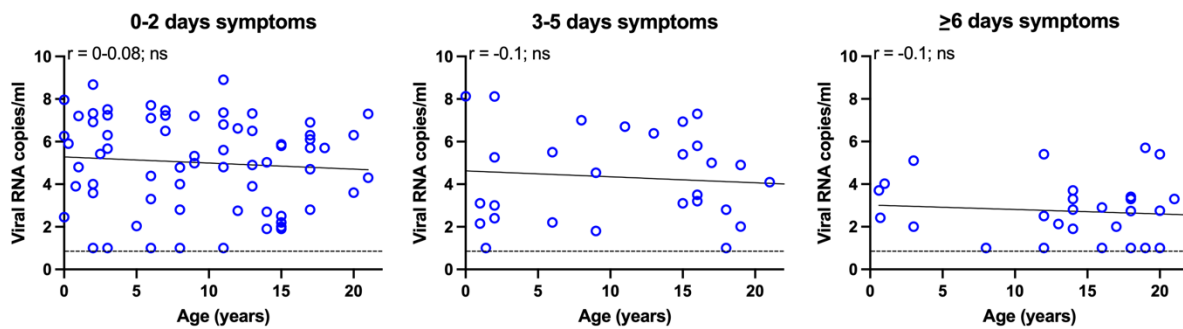

451
